# Supplementary material for: A new method for grasp stability analysis
Source: PeerJ journal article supplement (doi:10.7717/peerj.7463), 2007-02-16

Tree scale: 0.01

**CLASS**

- Dothideomycetes
- Eurotiomycetes
- Pezizomycetes
- Saccharomycetes
- Sordariomycetes
- unclassified

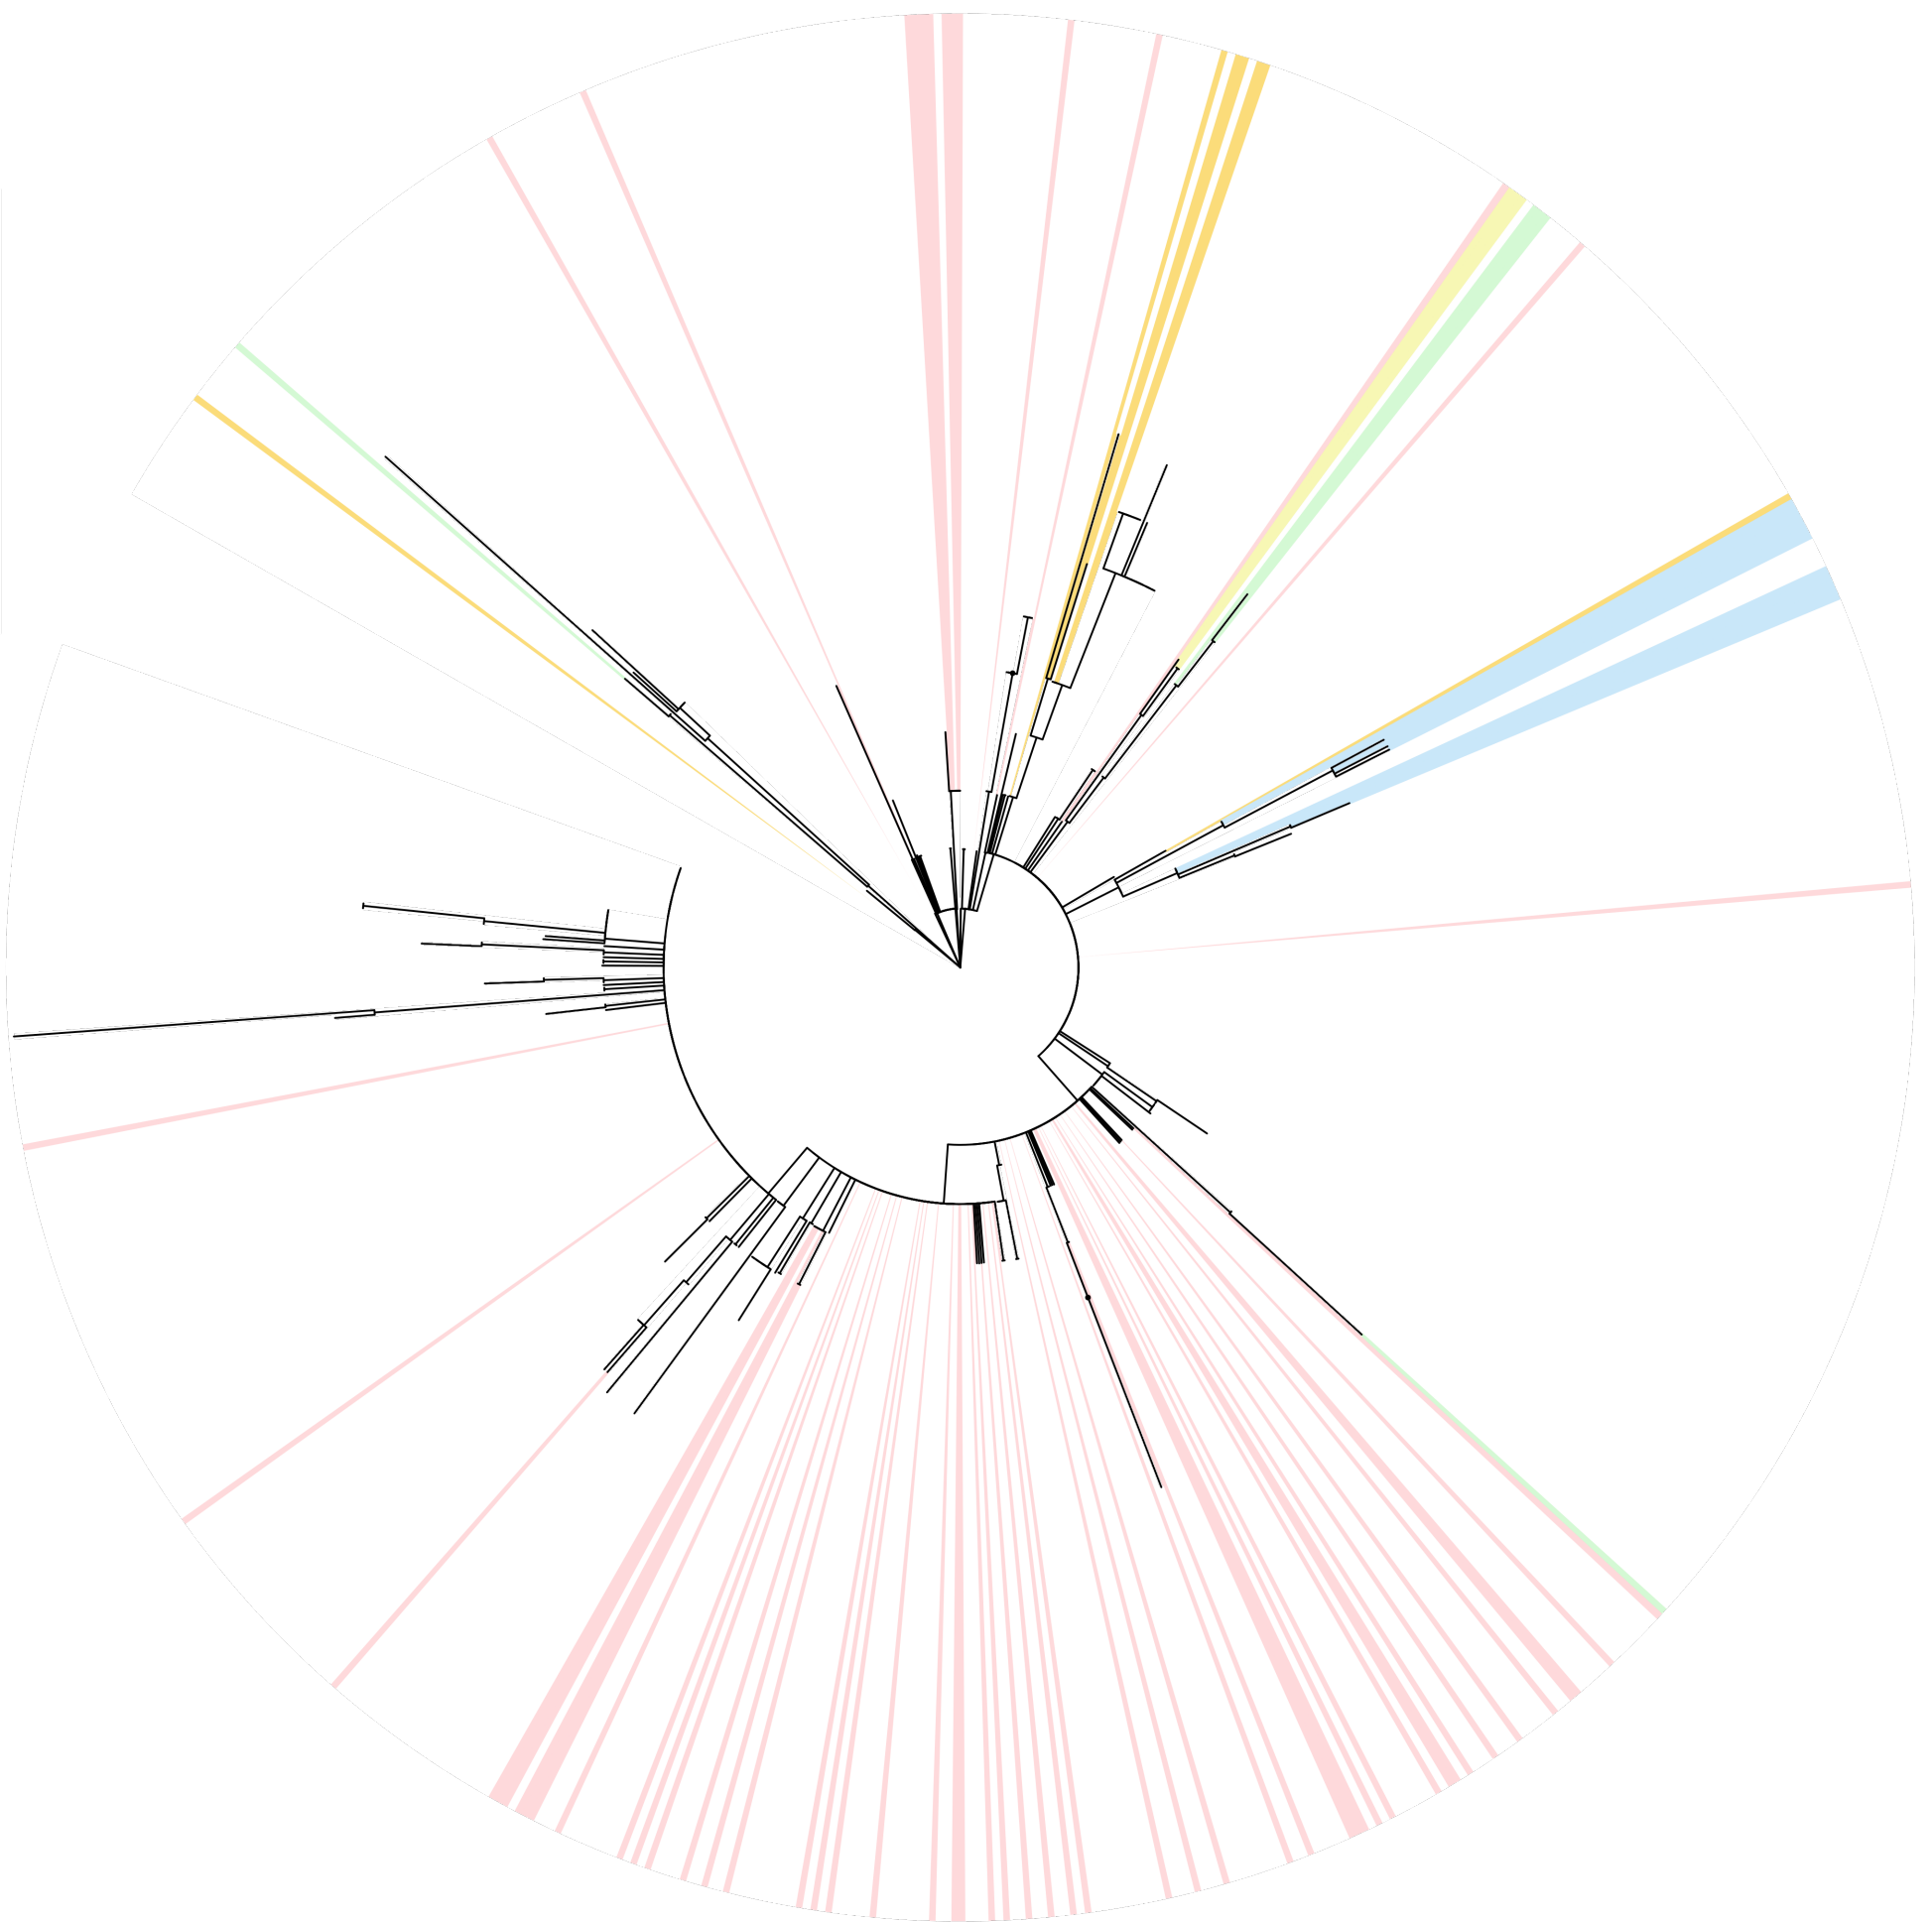

Tree scale: 0.1

**CLASS**

- Agaricomycetes
- Exobasidiomycetes
- Tremellomycetes
- unclassified
- Ustilaginomycetes

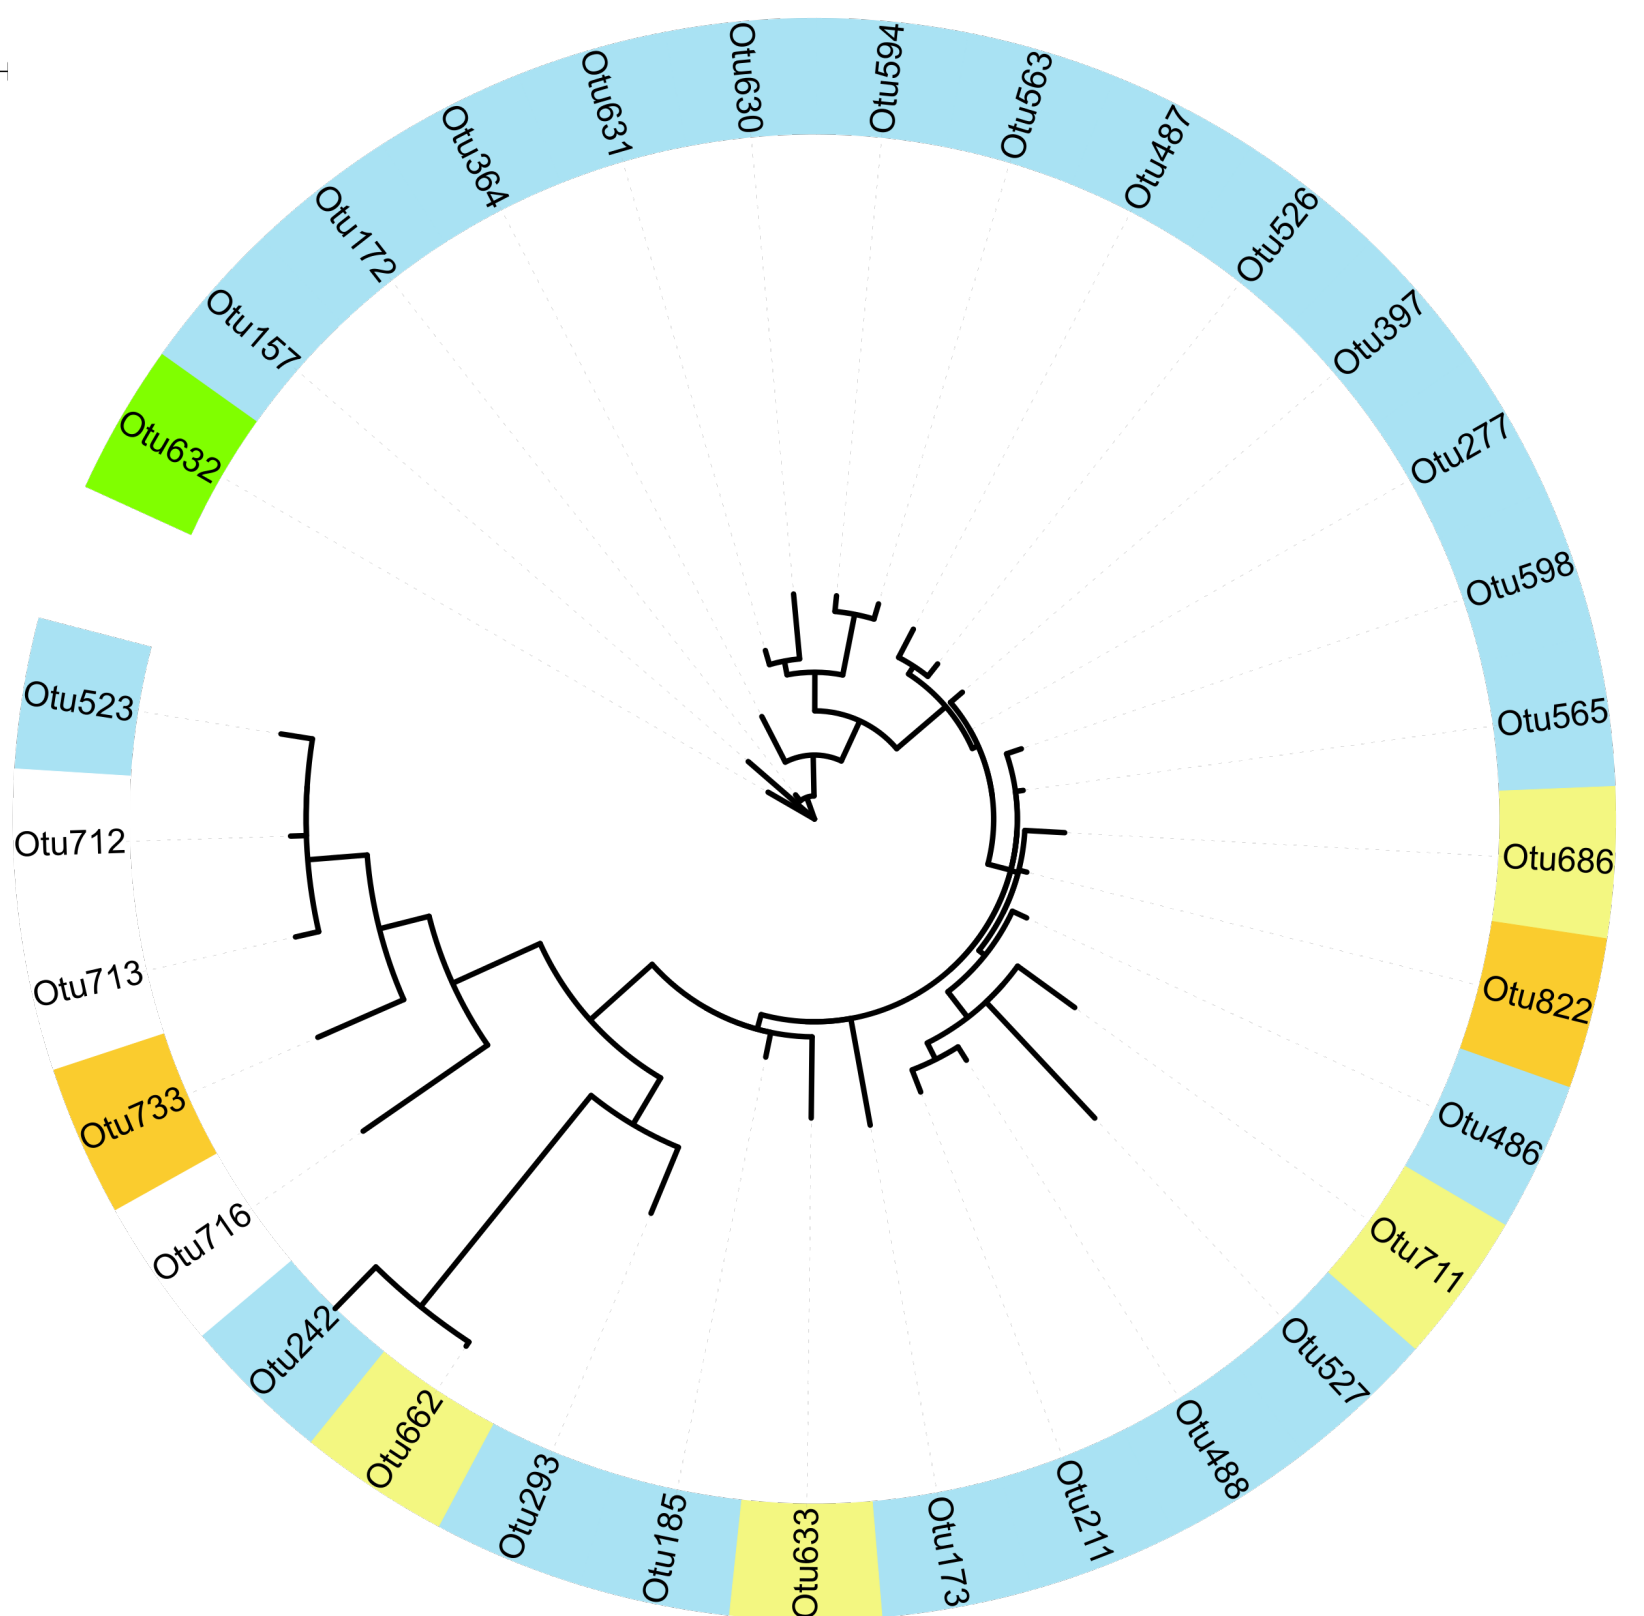

Supplement: Supplemental_Figure_S3.pdf [file Supplemental_Figure_S3.pdf]
