# Supplementary material for: A new method for grasp stability analysis
Source: PeerJ journal article supplement (doi:10.7717/peerj.7463), 2007-02-16

***Drought***

***77***

***737***

***48***

***Control***

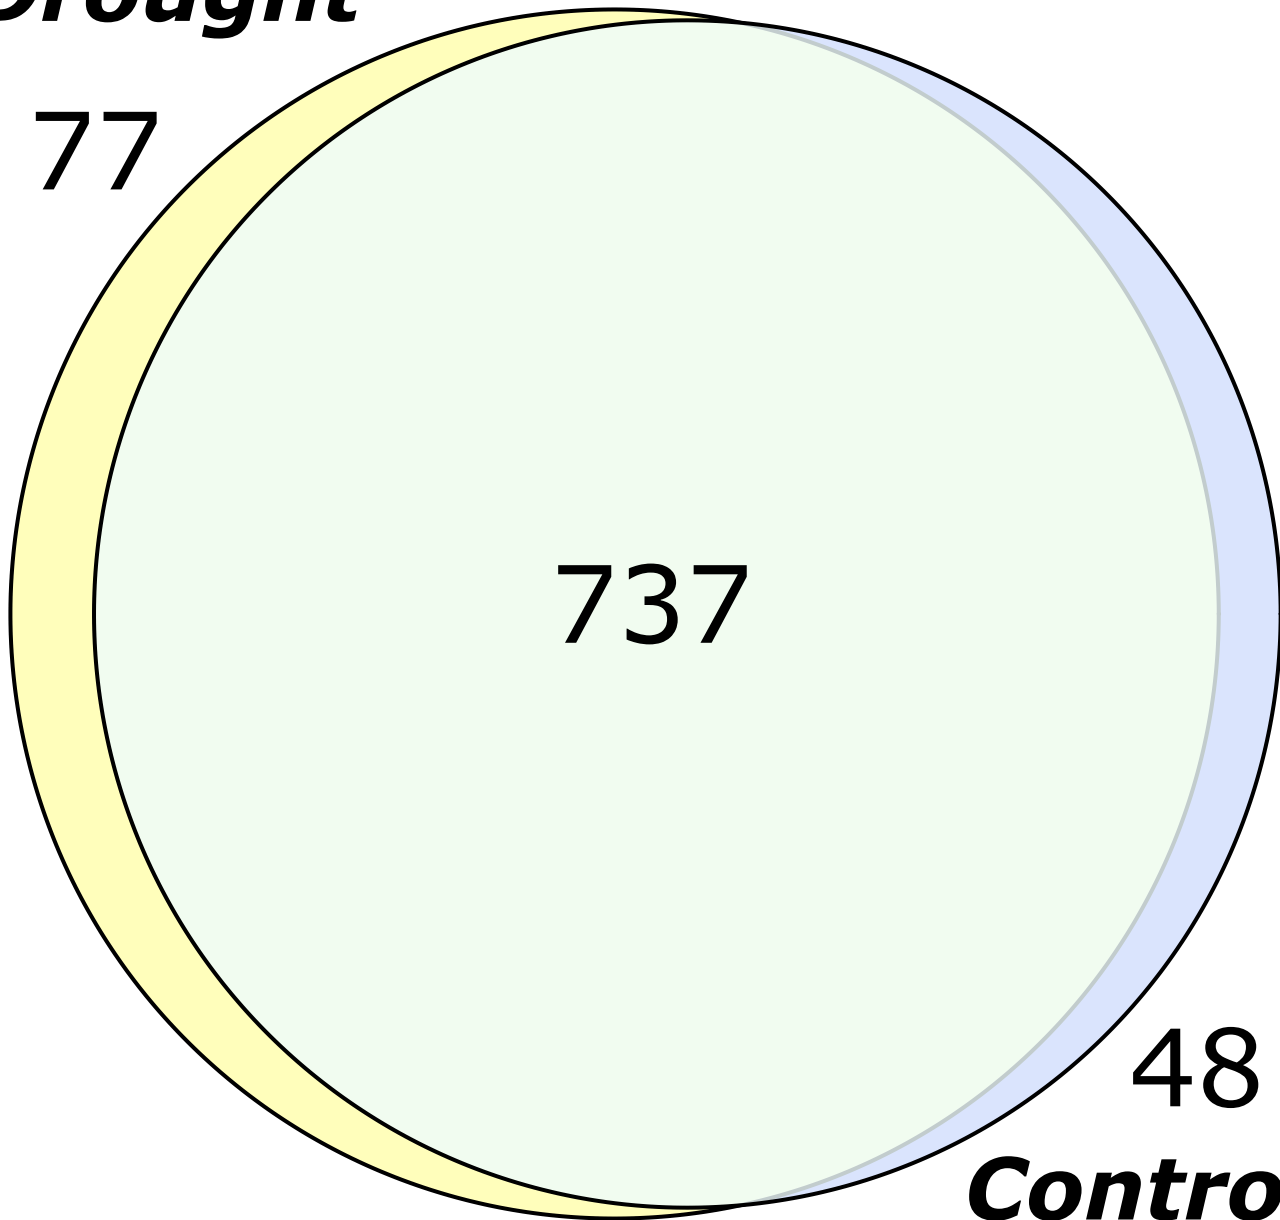

Supplement: Supplemental_Figure_S4.pdf [file Supplemental_Figure_S4.pdf]
