# Supplementary material for: A new method for grasp stability analysis
Source: PeerJ journal article supplement (doi:10.7717/peerj.7463), 2007-02-16

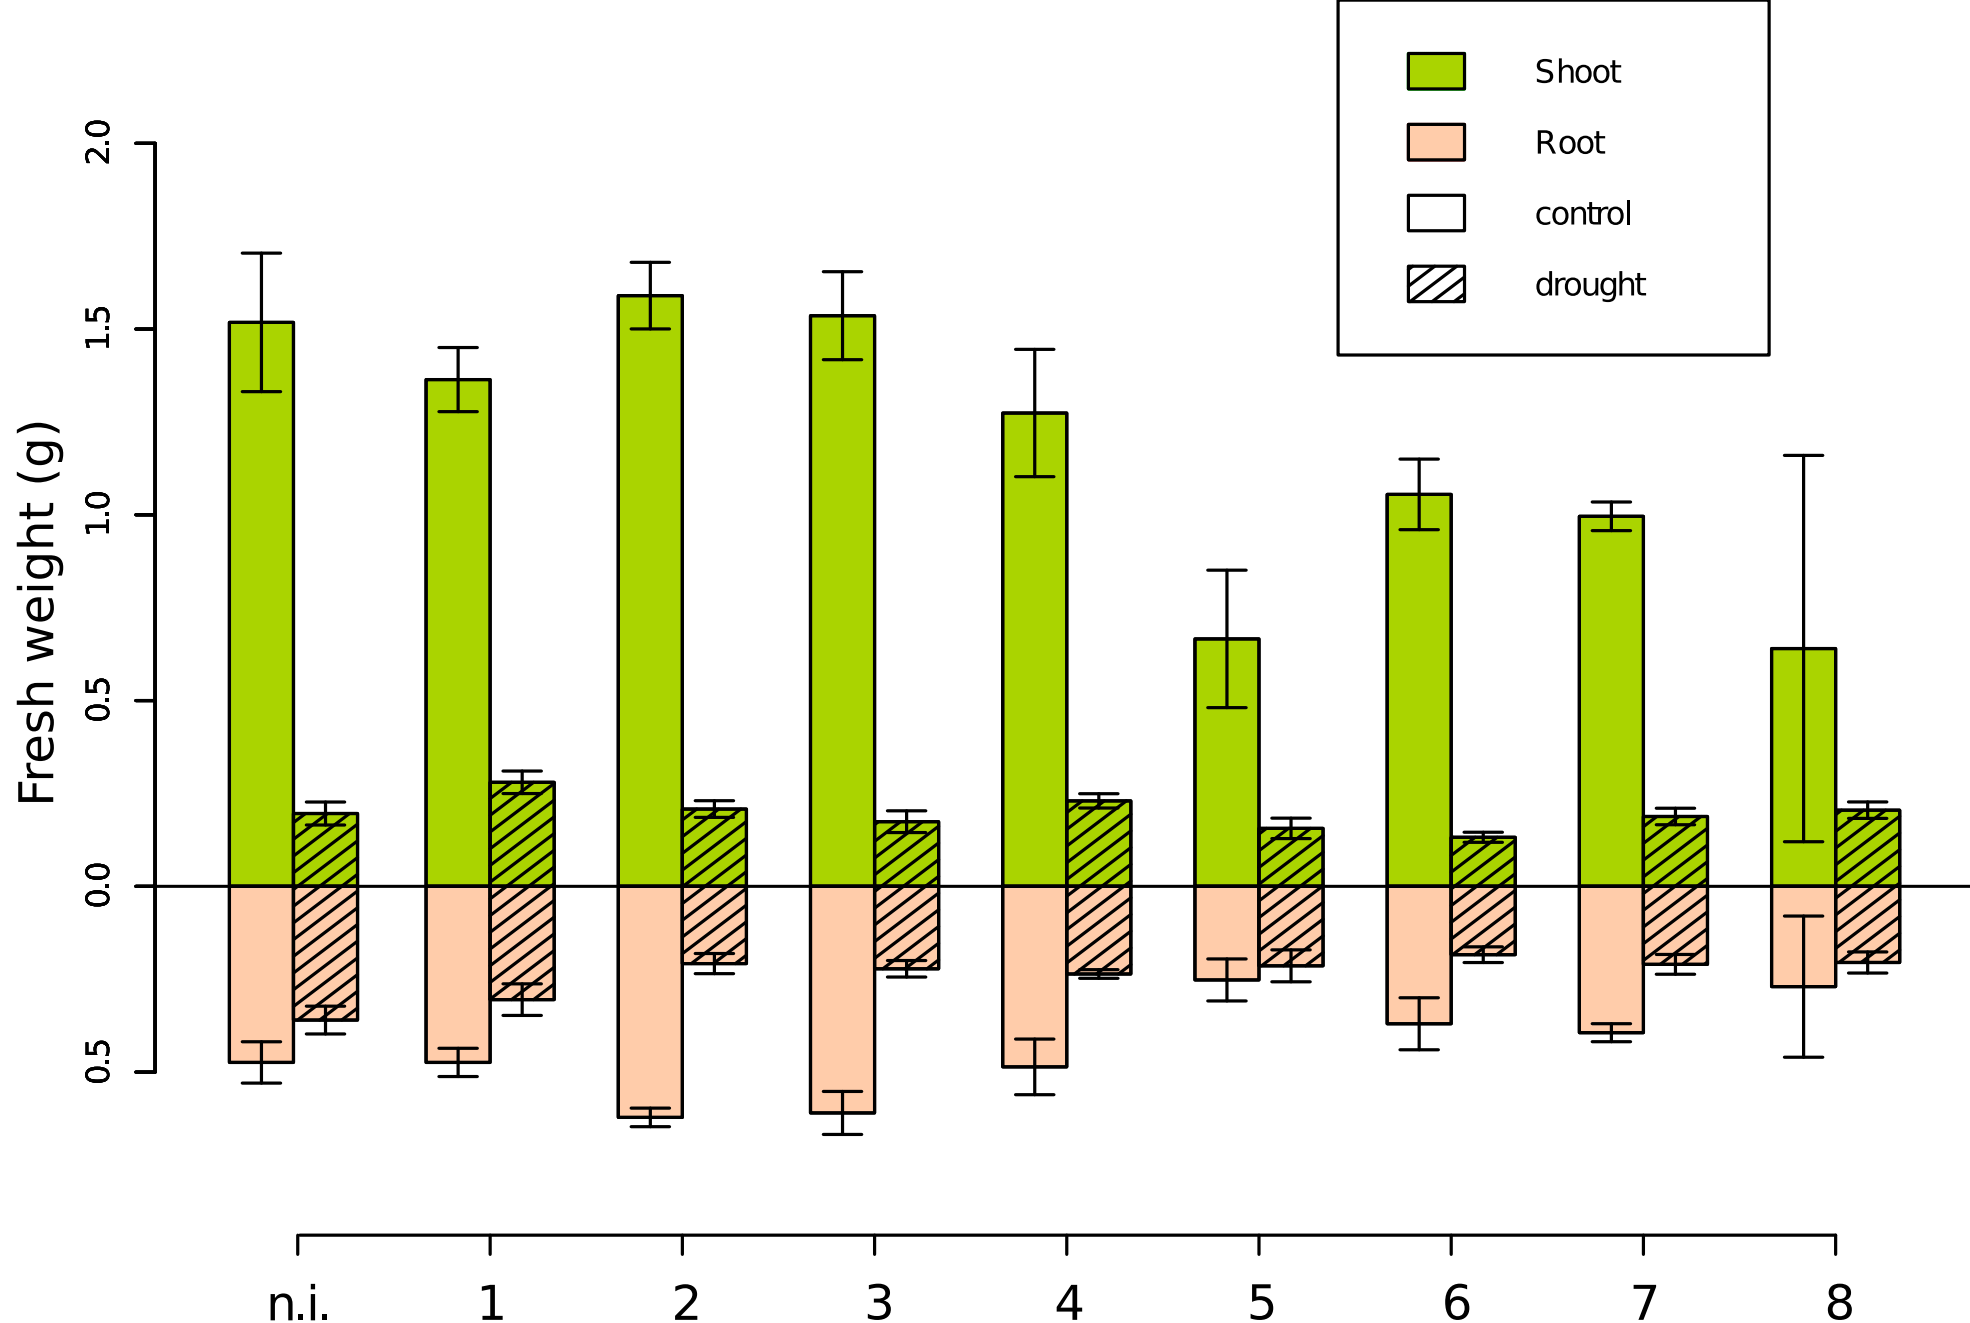

Supplement: Supplemental_Figure_S6.pdf [file Supplemental_Figure_S6.pdf]
